# Supplementary material for: A Comprehensive Study of the Estuary Sea Environment in the Bay of Bengal, near the Mahanadi River Confluence
Source: Research Square preprint supplement (doi:10.21203/rs.3.rs-3111420/v1), 2023-10-27
Supplement: Supplementary file 1 [file 3c6729cf1a090255fbcadc9c.docx]

Supported Data-1: Annual variation of Water quality parameters during study period in Bay of Bengal adjacent to confluence of River Mahanadi

| **Parameters** | **2013** | **2014** | **2015** | **2016** | **2017** | **2018** | **2019** | **2020** |
| --- | --- | --- | --- | --- | --- | --- | --- | --- |
| Temperature (°C) | 30.2-32.3  ( 31.3±0.73) | 26.8-29.1 (27.9±0.58) | 20.6-27.8 (23.4±1.51) | 27.0-29.5 (28.1±0.82) | 26.7-29.0 (28.2±0.70) | 22.2-26.7 (24.5±1.77) | 22.3-23.5 (22.9±0.33) | 22.4-27.1 (24.3±1.68) |
| pH | 7.1-7.9 (7.6±0.28) | 8.0-8.6  (8.2±0.15) | 7.6-8.5 (8.2±0.28) | 7.9-8.3  (8.2±0.11) | 8.1-8.7  (8.3±0.17) | 7.9-9.0 (8.6±0.27) | 7.0-8.5  (8.3±0.35) | 7.3-8.5 (8.2±0.28) |
| TSS (mg/l) | 17.8-62.8  (43.0±11.96) | 9.2-162.5  (30.1±36.65) | 4.9-35.6  (22.8±8.56) | 20.3-71.8  (53.7±17.68) | 15.7-120.8  (63.6±32.88) | 21.0-251.2  (112.5±93.57) | 19.4-103.5  (50.4±18.75) | 19.4-200.3  (71.1±30.97) |
| Salinity (PSU) | 8.20-33.31  (24.88±9.08) | 5.16-29.37  (19.47±7.50) | 4.25-29.62  (18.69±9.00) | 4.88-20.17  (17.20±4.14) | 7.01-20.17  (15.52±4.03) | 12.75-30.02  (25.73±3.12) | 10.45-30.62  (25.73±5.80) | 5.01-26.35  (22.06±7.06) |
| Turbidity (NTU) | 6.8-32.4  (18.1±7.07) | 3.6-144.9  (19.8±34.50) | 1.7-18.9  (6.2±3.99) | 0.5-14.4  (5.2±3.87) | 5.3-128.7  (41.1±30.06) | 0.2-42.4  (4.5±8.80) | 2.7-78.7  (13.3±14.11) | 3.6-114.2  (27.0±32.58) |
| DO (mg/l) | 6.0-6.8  (6.5±0.23) | 5.3-6.9  (6.2±0.42) | 5.8-7.7  (6.4±0.44) | 4.8-8.6  (6.2±0.94) | 3.6-6.3  (5.4±0.85) | 5.1-9.3  (6.1±0.87) | 3.1-9.4  (5.5±1.65) | 3.1-8.9  (5.1±1.33) |
| BOD (mg/l) | 0.5-2.3  (1.4±0.61) | 0.3-3.0  (1.4±0.67) | 0.5-4.2  (1.5±0.82) | 0.6-1.9  (1.0±0.37) | 0.9-2.0  (1.4±0.33) | 0.2-2.5  (1.0±0.56) | 0.2-6.3  (1.5±1.53) | 0.3-6.3  (1.3±1.12) |
| TOC (mg/l) | 0.15-0.35  (0.24±0.06) | 0.06-1.27  (0.52±0.34) | 0.04-2.93  (0.55±0.60) | 0.01-0.21  (0.05±0.04) | 0.00-0.24  (0.05±0.06) | 0.04-1.09  (0.41±0.33) | 0.00-1.39  (0.29±0.28) | 0.07-1.41  (0.56±0.44) |
| Nitrite (µmol/l) | 0.30-0.92  (0.65±0.20) | 0.20-2.28  (0.59±0.43) | 0.02-7.09  (1.25±1.68) | 0.08-3.09  (0.46±0.65) | 0.14-1.01  (0.35±0.22) | 0.10-2.97  (0.59±0.75) | 0.13-2.57  (0.54±0.51) | 0.10-1.37  (0.47±0.30) |
| Ortho-Phosphate (µmol/l) | 0.23-5.12  (2.15±1.86) | 0.63-36.68  (6.63±7.48) | 3.05-51.07  (10.90±14.13) | 1.68-19.69  (8.52±4.78) | 1.58-13.74  (3.71±2.94) | 0.21-1.95  (0.67±0.41) | 0.63-211.01  (14.44±45.80) | 0.74-104.52  (9.03±20.40) |
| Silicate (µmol/l) | 10.86-86.88  (38.26±30.47) | 23.57-104.98  (51.51±26.10) | 12.92-99.48  (38.18±31.62) | 21.23-88.44  (43.75±22.41) | 10.86-52.56  (24.75±14.00) | 3.58-211.01  (86.29±76.62) | 0.65-536.48  (74.73±154.40) | 0.76-551.90  (157.67±175.65) |
| FC (MPN/100 ml) | 2.0-230.0  (118.1±89.41) | 9.0-4006.7  (387.9±902.47) | 0.0-2400.0  (154.9±509.10) | 0.0-140.0  (22.3±48.89) | 0.0-895.0  (171.1±268.86) | 0.0-490.0  (35.7±103.71) | 0.0-1600.0  (129.0±341.18) | 0.0-920.0  (95.2±241.12) |
| Chl-a (mg/m3) | 0.30-1.83  (0.93±0.58) | 0.10-2.37  (0.96±0.55) | 0.33-14.67  (2.66±3.92) | 0.35-4.78  (1.86±1.22) | 0.00-8.68  (1.20±2.08) | 0.02-6.14  (0.99±1.22) | 0.00-5.43  (1.60±1.47) | 0.00-6.01  (2.39±1.95) |
| Hg (µg/l) | 0.00-0.43  (0.24±0.12) | 0.06-2.48  (0.47±0.50) | 0.00-1.52  (0.41±0.32) | 0.06-2.64  (0.39±0.55) | 0.00-0.76  (0.41±0.23) | 0.00-0.76  (0.29±0.21) | 0.06-0.25  (0.12±0.05) | 0.06-0.25  (0.10±0.04) |
| Mn (µg/l) | 0.38-0.73  (0.52±0.11) | 0.21-0.62  (0.30±0.11) | 0.19-0.52  (0.25±0.08) | 0.19-2.23  (0.43±0.43) | 0.19-0.59  (0.29±0.11) | 0.04-0.51  (0.21±0.12) | 0.01-2.90  (0.70±0.79) | 0.01-2.90  (0.90±0.91) |
| Fe (µg/l) | 12.47-28.78  (20.25±4.39) | 0.49-25.83  (4.33±6.84) | 0.49-18.25  (1.98±3.69) | 0.71-22.02  (7.20±7.04) | 0.50-25.83  (5.07±7.47) | 0.50-15.25  (3.49±4.43) | 23.46-397.90  (102.32±94.88) | 23.46-381.72  (99.84±78.70) |
| Pb (µg/l) | 0.16-0.54  (0.29±0.10) | 0.07-2.62  (0.67±0.61) | 0.05-0.59  (0.15±0.13) | 0.05-1.02  (0.33±0.30) | 0.05-1.96  (0.45±0.56) | 0.01-5.34  (1.31±1.50) | 0.12-24.96  (1.91±4.41) | 0.12-26.89  (2.94±5.10) |
| Cd (µg/l) | 0.09-0.26  (0.14±0.05) | 0.05-0.36  (0.13±0.09) | 0.03-0.51  (0.12±0.11) | 0.04-0.51  (0.16±0.13) | 0.03-0.37  (0.11±0.09) | 0.003-0.51  (0.18±0.16) | 0.38-3.76  (1.91±0.93) | 0.38-3.76  (1.85±0.98) |
