# Supplementary figures and images for: A Comprehensive Study of the Estuary Sea Environment in the Bay of Bengal, near the Mahanadi River Confluence
Source: Research Square preprint supplement (doi:10.21203/rs.3.rs-3111420/v1), 2023-10-27

**Graphical Abstract**

**
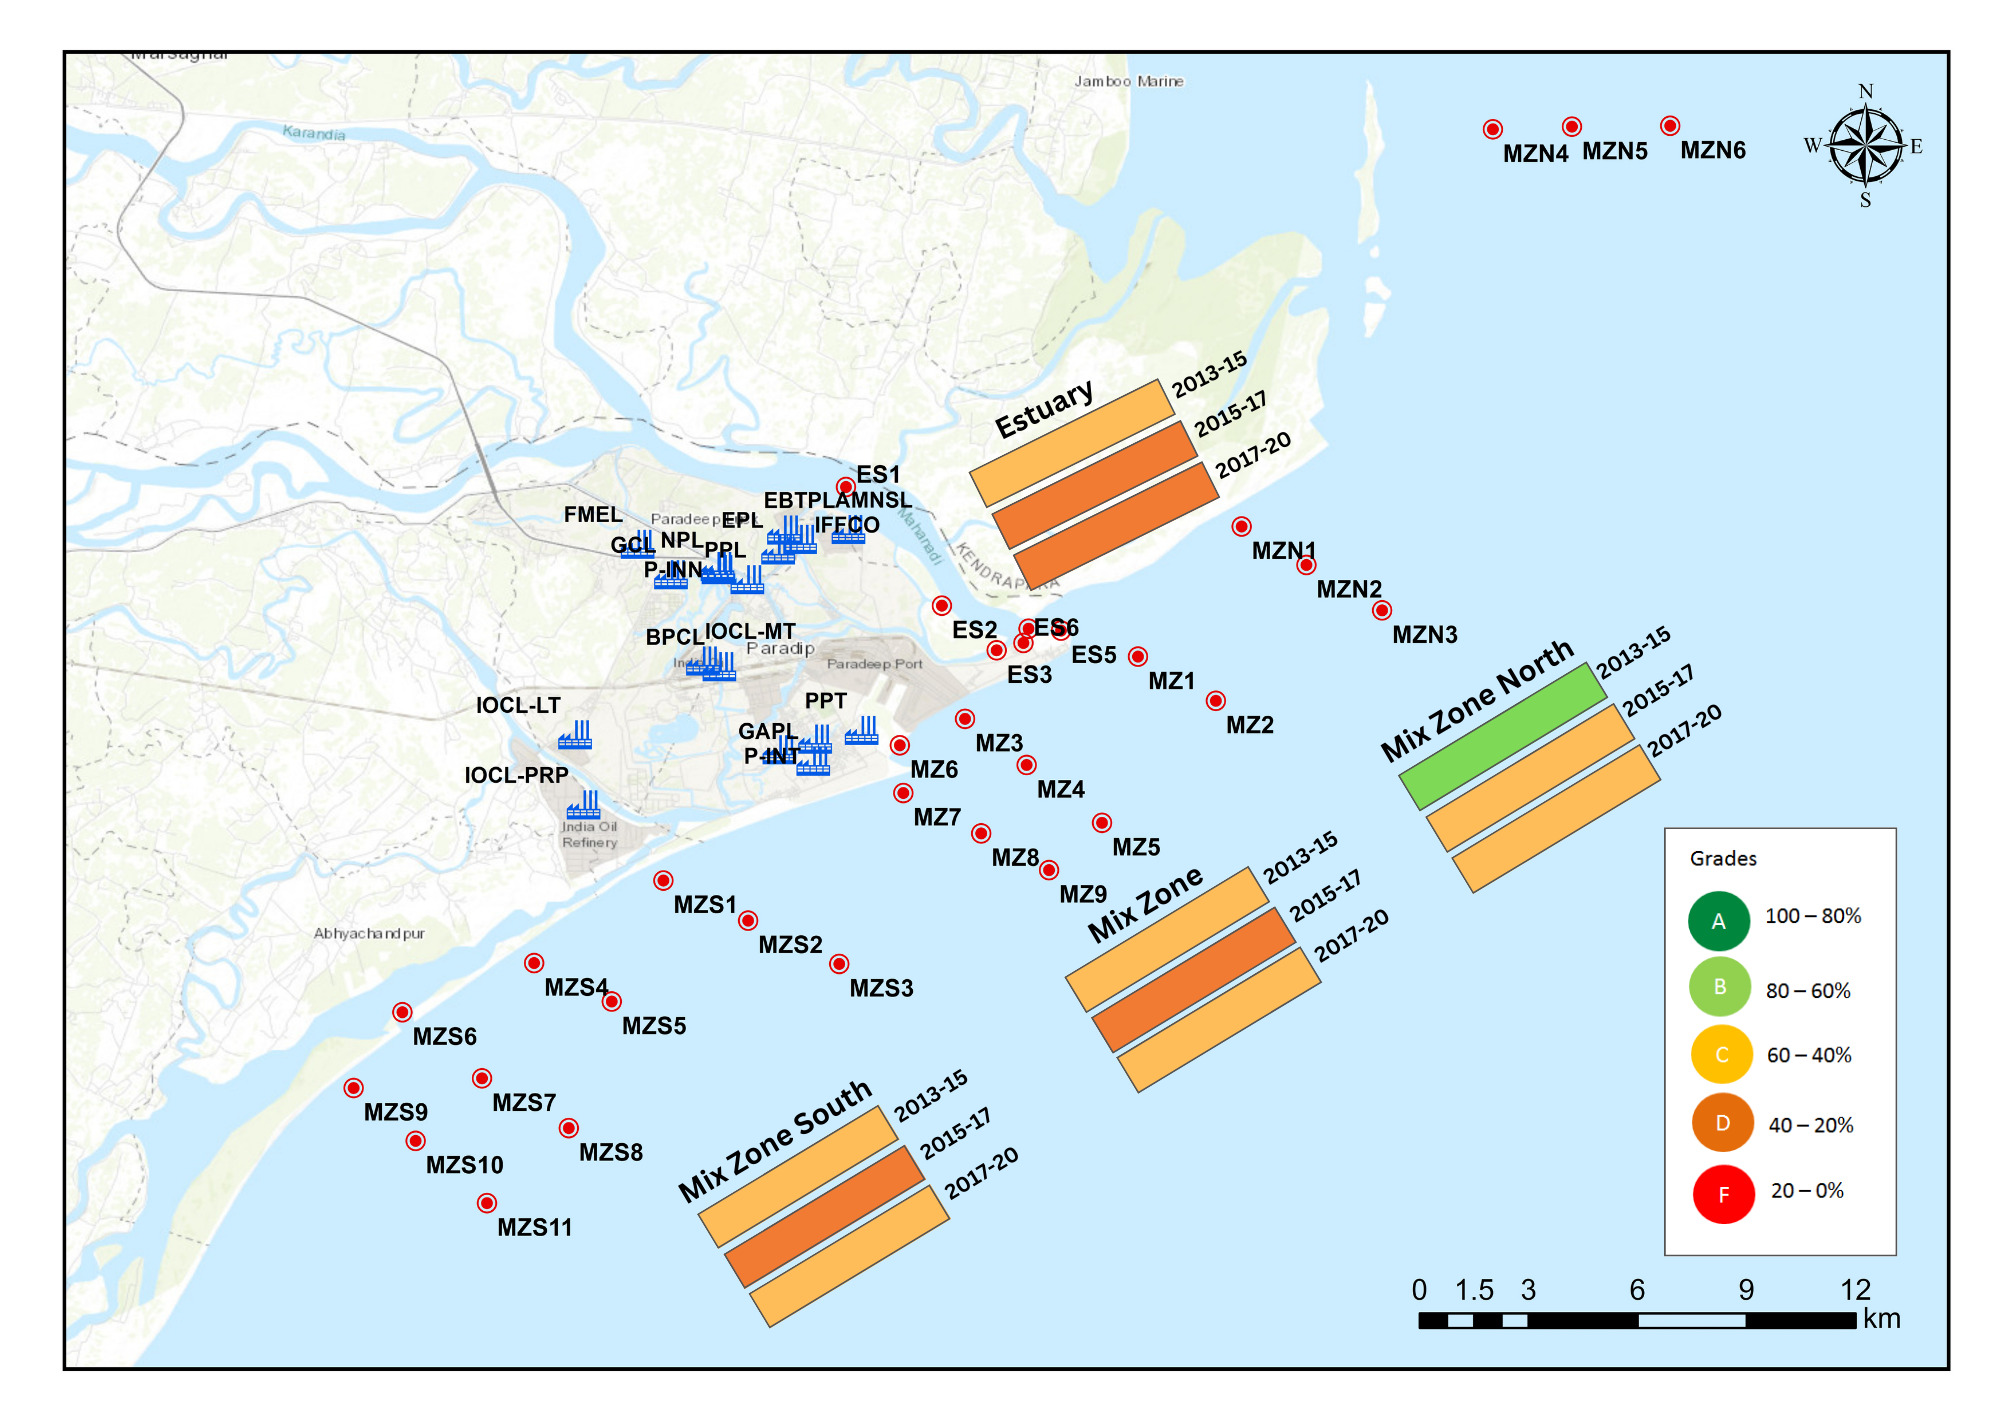
**

Supplement: Supplementary file 2 [file f4701369384b3eb14d9a3a5e.docx]
